# Supplementary material for: A clear solution: semiconductor nanocrystals as photoinitiators in solvent free polymerization
Source: Royal Society of Chemistry journal article supplement (doi:10.1039/c9nr03086g), 2019-01-01
Supplement: c9nr03086g1.pdf [file c9nr03086g1.pdf]

## Supporting Information

### A Clear Solution: Semiconductor Nanocrystals as Photoinitiators in Solvent Free Polymerization

Lior Verbitsky, Nir Waiskopf, Shlomo Magdassi, Uri Banin\*

Institute of Chemistry and the Center for Nanoscience and Nanotechnology, The Hebrew University of Jerusalem, Safra Campus, Givat Ram, Jerusalem 91904, Israel  
E-mail: uri.banin@mail.huji.ac.il

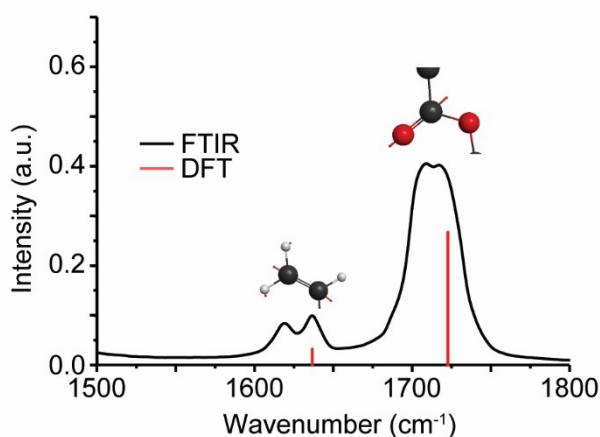

**Supplementary Figure S1.** HEA spectrum as measured by FTIR (black) and calculated by DFT (red). Insets: relevant vibrations as obtained. Doublets in the FTIR measurements come from s-cis/s-trans isomerism of the monomers in solution<sup>[1]</sup>, while the DFT was optimized and analyzed only for s-cis conformation.

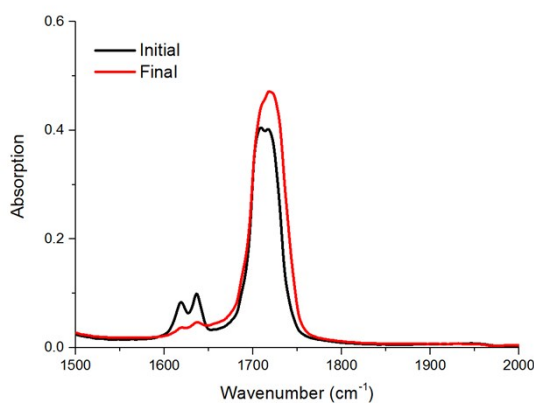

**Supplementary Figure S2.** Initial (black) and final (red) spectra of HEA, before and after the polymerization.

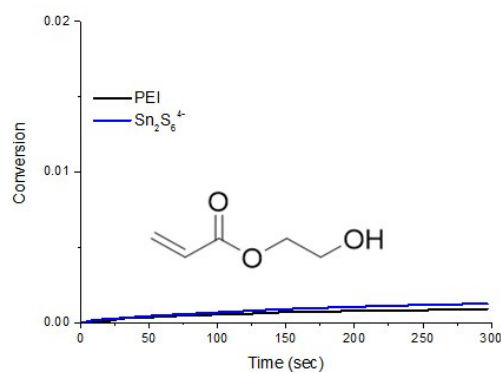

**Supplementary Figure S3.** Control experiments of HEA polymerization. Both sole PEI (black) and  $\text{Sn}_2\text{S}_6^{4-}$  (blue) produced no polymerization of HEA in the absence of SCNCs.

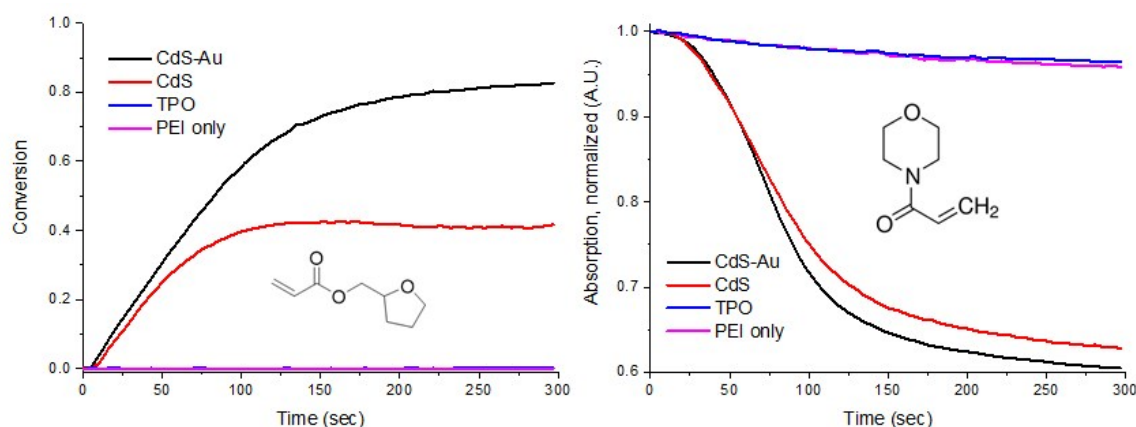

**Supplementary Figure S4.** Conversion of THFA (a) as function of time by HNPs (black) and nanorods (red). Both PEI in the absence of SCNCs (blue) and  $5\mu\text{M}$  TPO in HEA (pink) produced no significant polymerization. Inset: structure of THFA. (b) The decrease in the acrylate absorption peak of ACMO after normalization to the initial absorption value of nanorods (red) and HNPs (black). The conversion could not be deduced from the FTIR spectrum of ACMO. Inset: structure of ACMO. Both PEI in the absence of SCNCs (blue) and  $5\mu\text{M}$  TPO in HEA (pink) produced no significant polymerization. This experiment shows the generality of the quantum PI approach for solvent-free polymerization.

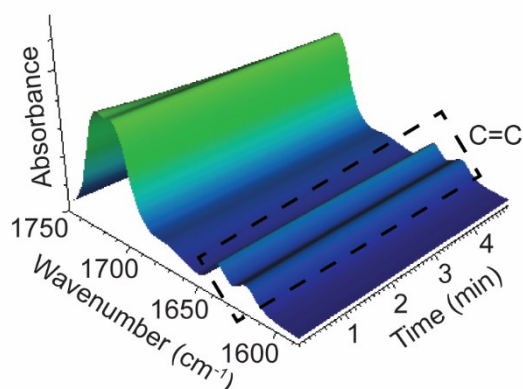

**Supplementary Figure S5.** 3D FTIR spectrum of the polymerization process of HEA using  $\text{CdS-S}^{2-}$  without water. The C=C doublet at  $1619\text{ cm}^{-1}$  and  $1640\text{ cm}^{-1}$ , as confirmed by DFT calculations, is constant over time. The carbonyl stretching is seen at  $1708\text{ cm}^{-1}$ .

#### **Terephthalic acid (TPA) assay**

TPA assay was used to measure hydroxyl radical production. This assay is based on a chemical reaction between hydroxyl radicals and TPA, producing 2-hydroxyterephthalic acid,

which has a characteristic emission peak at 425 nm.<sup>[2]</sup> In a typical procedure, 575  $\mu\text{L}$  of 1 mg/mL TPA in water is placed in a quartz cuvette, together with 25  $\mu\text{L}$  of nanoparticles solution with optical density of 1 at 405 nm. The solution, under constant stirring, is irradiated with a 405 nm laser ( $20\text{mW}/\text{cm}^2$ ), to excite the nanoparticles, and the oxidation products are simultaneously excited at 310 nm resulting in fluorescence which is measured at 425 nm.

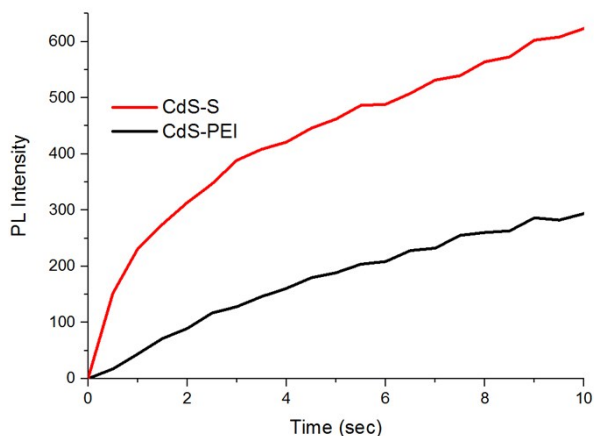

**Supplementary Figure S6.** PL intensity as measured from hydroxyl radical mediated oxidation of TPA (ex. 310nm/em. 425 nm) of  $\text{S}^{2-}$  (red) and PEI (black)-capped nanorods.

References:

- [1] R. A. Nyquist, S. Fiedler, R. Streck, *Vib. Spectrosc.* **1994**, *6*, 285.
- [2] J. C. Barreto, G. S. Smith, N. H. P. Strobel, P. A. McQuillin, T. A. Miller, *Life Sci.* **1994**, *56*, PL89.
